# Supplementary material for: Single Nucleotide Polymorphism Analysis Indicates Genetic Distinction and Reduced Diversity of Swine-Associated Methicillin Resistant Staphylococcus aureus (MRSA) ST5 Isolates Compared to Clinical MRSA ST5 Isolates
Source: Front Microbiol. 2018 Sep 11;9:2078. doi: 10.3389/fmicb.2018.02078 (PMC6142820; doi:10.3389/fmicb.2018.02078)
Supplement: TABLE S1 — Genome sequencing statistics and MGE composition for all isolates used in study. [file Table_1.xlsx]

## Sheet: Supplemental 1
Table S1. Genome sequencing statistics and MGE composition for all isolates used in study
Isolate Name	Source	Spa Type		Sequence Read Archive	Genome Accession Number	Genome Coverage	Number of Contigs	% GC Content	Sequence Length		β-Hemolysin Converting Bacteriophage	SCCmec type	Tetracycline Resistance Genes	Erm Macrolide Resistance Gene
ISU837	Environment	t002		SRR5909281	LKVQ00000000	52.86	60	32.8	2815228		absent	IV	none found	none found
ISU839	Environment	t002		SRR5909282	LKVR00000000	40.15	138	32.8	2877876		absent	IV	none found	none found
ISU842	Environment	t002		SRR5909279	LKVS00000000	77.53	115	32.9	2762053		absent	IV	none found	none found
ISU871	Pig	t002		SRR5909249	LKVT00000000	62.61	137	32.8	2868987		absent	III	none found	ermC
ISU872	Pig	t002		SRR5909269	LKVU00000000	64.16	107	32.7	2913297		absent	III	none found	ermC
ISU873	Pig	t002		SRR5909177	LKVV00000000	57.95	110	32.7	2871315		absent	III	none found	ermC
ISU874	Pig	t002		SRR5909267	LKVW00000000	58.5	175	32.9	2416237		absent	III	tetL, tetT	ermC
ISU875	Pig	t002		SRR5909268	LKVX00000000	50.01	107	32.8	2866860		absent	III	tetL, tetT	ermC
ISU876	Pig	t002		SRR5909254	LKVY00000000	35.52	198	32.8	2862876		absent	III	tetL, tetT	ermC
ISU877	Pig	t002		SRR5909255	LKVZ00000000	25.39	168	32.8	2855429		absent	III	none found	ermC
ISU878	Pig	t002		SRR5909212	LKWA00000000	28.3	142	32.8	2923998		absent	III	tetL, tetT	ermC
ISU879	Pig	t002		SRR5909213	LKWB00000000	59.75	174	32.8	2795064		absent	III	none found	ermC
ISU880	Pig	t002		SRR5909210	LKWC00000000	50.06	173	32.7	2950113		absent	III	tetL, tetT	ermC
ISU881	Pig	t002		SRR5909211	LKWD00000000	26.98	141	32.8	2849429		absent	III	tetL, tetT	ermC
ISU882	Pig	t002		SRR5909208	LKWE00000000	59.74	102	32.8	2825420		absent	III	none found	ermC
ISU883	Environment	t002		SRR5909209	LKWF00000000	21.31	231	32.8	2774649		absent	III	tetL, tetT	ermC
ISU886	Human - Short Term Contact	t002		SRR5909206	LKWG00000000	82.26	120	32.8	2784395		absent	III	none found	ermC
ISU887	Human - Short Term Contact	t002		SRR5909207	LKWH00000000	41.07	78	32.8	2865499		absent	III	none found	ermC
ISU888	Human - Short Term Contact	t002		SRR5909204	LKWI00000000	42.62	194	32.7	2953299		absent	III	none found	ermC
ISU889	Human - Short Term Contact	t002		SRR5909205	LKWJ00000000	39.08	220	32.8	2934107		absent	III	none found	ermC
ISU928	Human - Short Term Contact	t002		SRR5909146	LKWY00000000	29.49	146	32.8	2827519		absent	IV	tetL, tetT	none found
ISU930	Human - Short Term Contact	t002		SRR5909145	LKWZ00000000	37.43	91	32.8	2786299		absent	IV	tetL, tetT	none found
ISU931	Human - Short Term Contact	t002		SRR5909144	LKXA00000000	36.54	196	32.9	2581353		absent	IV	tetL, tetT	none found
ISU933	Pig	t002		SRR5909143	LKXB00000000	43.18	163	32.9	2730852		absent	IV	tetL, tetT	none found
ISU934	Pig	t002		SRR5909142	LKXC00000000	26.69	140	32.9	2807756		absent	IV	tetL, tetT	none found
ISU935	Pig	t002		SRR5909141	LKXD00000000	18.71	192	32.9	2768283		absent	IV	tetL, tetT	none found
ISU936	Pig	t002		SRR5909140	LKXE00000000	33.15	105	32.8	2794320		absent	IV	tetL, tetT	none found
ISU939	Pig	t002		SRR5909139	LKXF00000000	31.89	154	32.9	2700832		absent	IV	tetL, tetT	none found
ISU940	Environment	t002		SRR5909150	LKXG00000000	52.49	98	32.8	2754945		absent	IV	none found	none found
ISU941	Pig	t002		SRR5909149	LKXH00000000	63.97	134	33	2692396		absent	IV	tetL, tetT	none found
ISU943	Environment	t002		SRR5909151	LKXI00000000	54.66	145	32.9	2719757		absent	IV	tetL, tetT	none found
ISU944	Environment	t002		SRR5909152	LKXJ00000000	14.52	264	33	2683222		absent	IV	tetL	none found
ISU946	Environment	t002		SRR5909153	LKXK00000000	36.83	80	32.8	2768216		absent	IV	tetL, tetT	none found
ISU947	Environment	t002		SRR5909154	LKXL00000000	39.23	164	33	2618338		absent	IV	tetL, tetT	none found
ISU948	Environment	t002		SRR5909155	LKXM00000000	18.98	172	32.9	2733388		absent	IV	tetL, tetT	none found
ISU949	Pig	t002		SRR5909156	LKXN00000000	52.56	126	32.9	2760960		absent	IV	tetL, tetT	none found
ISU951	Pig	t002		SRR5909157	LKXO00000000	35.47	131	32.9	2754227		absent	IV	tetL, tetT	none found
ISU952	Pig	t002		SRR5909158	LKXP00000000	34.31	153	32.9	2766929		absent	IV	tetL, tetT	none found
ISU953	Pig	t002		SRR5909159	LKXQ00000000	27.51	115	32.8	2794778		absent	IV	tetL, tetT	none found
ISU954	Pig	t002		SRR5909160	LKXR00000000	31.65	114	32.9	2742118		absent	IV	tetL, tetT	none found
ISU956	Pig	t002		SRR5909270	LKXS00000000	27.32	198	32.9	2781883		absent	IV	tetL, tetT	none found
ISU960	Environment	t002		SRR5909266	LKXT00000000	22.56	160	32.9	2802282		absent	IV	tetL, tetT	none found
ISU961	Environment	t002		SRR5909272	LKXU00000000	12.46	392	32.9	2793789		absent	IV	none found	none found
ISU962	Environment	t002		SRR5909271	LKXV00000000	40.02	122	32.8	2756630		absent	IV	tetL, tetT	none found
ISU963	Environment	t002		SRR5909274	LKXW00000000	44.82	118	32.8	2773249		absent	IV	tetL, tetT	none found
ISU964	Environment	t002		SRR5909273	LKXX00000000	36.13	125	32.8	2834992		absent	IV	tetL, tetT	none found
ISU968	Pig	t002		SRR5909276	LKXY00000000	48.31	155	32.9	2666570		absent	IV	tetL, tetT	none found
ISU969	Pig	t002		SRR5909275	LKXZ00000000	18.26	172	32.8	2742057		absent	IV	tetL, tetT	none found
ISU970	Pig	t002		SRR5909278	LKYA00000000	30.09	91	32.8	2792989		absent	IV	tetL, tetT	none found
ISU971	Pig	t002		SRR5909277	LKYB00000000	21.67	187	32.9	2709301		absent	IV	tetL, tetT	none found
ISU973	Environment	t002		SRR5909286	LKYD00000000	52.18	200	33	2655048		absent	IV	tetL, tetT	none found
ISU976	Pig	t002		SRR5909283	LKYE00000000	16.94	261	33.1	2549148		absent	IV	tetL, tetT	none found
ISU978	Pig	t002		SRR5909284	LKYF00000000	53.16	188	32.8	2793837		absent	IV	tetL, tetT	ermC
ISU979	Pig	t002		SRR5909289	LKYG00000000	51.52	176	32.9	2704845		absent	IV	tetL, tetT	none found
ISU980	Environment	t002		SRR5909290	LKYH00000000	68.97	126	32.9	2673815		absent	IV	tetL, tetT	none found
ISU981	Environment	t002		SRR5909287	LKYI00000000	78.78	142	33	2620053		absent	IV	none found	none found
ISU982	Environment	t002		SRR5909288	LKYJ00000000	46.3	272	33.3	2474594		absent	IV	tetL, tetT	none found
ISU983	Environment	t002		SRR5909291	LKYK00000000	49.2	85	32.8	2836929		absent	IV	tetL, tetT	none found
ISU992	Pig	t548		SRR5909292	LKYL00000000	32.47	259	33	2524485		absent	untypable	tetL, tetT	ermC
ISU993	Environment	t002		SRR5909239	LKYM00000000	38.92	221	33	2675604		absent	untypable	tetL, tetT	ermC
ISU994	Environment	t002		SRR5909238	LKYN00000000	20.49	199	32.9	2708674		absent	untypable	tetL, tetT	ermC
ISU995	Environment	t002		SRR5909237	LKYO00000000	43.37	149	32.8	2786439		absent	untypable	tetL, tetT	none found
ISU996	Environment	t002		SRR5909236	LKYP00000000	17.77	185	32.9	2735697		absent	untypable	tetL, tetT	ermC
ISU998	Environment	t002		SRR5909243	LKYQ00000000	51.18	102	32.8	2815448		absent	untypable	tetL, tetT	none found
ISU1000	Pig	t002		SRR5909242	LKVI00000000	31.07	243	33	2662194		absent	untypable	tetL, tetT	ermC
ISU1001	Pig	t002		SRR5909241	LKVJ00000000	22.23	157	32.8	2842047		absent	untypable	tetL, tetT	ermC
ISU1002	Pig	t548		SRR5909240	LKVK00000000	29.08	157	32.8	2829512		absent	untypable	tetL, tetT	ermC
ISU1004	Human - Short Term Contact	t548		SRR5909235	LKVL00000000	31.37	194	32.8	2764037		absent	untypable	tetL, tetT	ermC
ISU1007	Human - Short Term Contact	t1107		SRR5909234	LKVM00000000	54.6	190	33	2723138		absent	untypable	tetL, tetT	ermC
ISU1008	Pig	t548		SRR5909260	LKVN00000000	25.44	111	32.8	2786516		absent	untypable	tetL, tetT	ermC
ISU1009	Pig	t002		SRR5909261	LKVO00000000	55.49	69	32.8	2785372		absent	untypable	tetL, tetT	none found
ISU1010	Pig	t002		SRR5909262	LKVP00000000	54.23	91	32.8	2810766		absent	untypable	tetL, tetT	ermC
UMN1	Human - Long Term Contact	t002		SRR5909263	LLBO00000000	27.44	256	33	2529850		absent	untypable	tetL, tetT	ermC
UMN2	Human - Long Term Contact	t002		SRR5909256	LLBP00000000	47.54	143	32.8	2830285		absent	untypable	tetL, tetT	ermC
UMN3	Human - Long Term Contact	t002		SRR5909257	LLBQ00000000	57.94	156	32.9	2691381		absent	untypable	tetL, tetT	ermC
UMN4	Human - Long Term Contact	t002		SRR5909258	LLBS00000000	21.15	134	32.8	2861601		absent	untypable	tetL, tetT	ermC
UMN5	Human - Long Term Contact	t002		SRR5909259	LLBT00000000	37.41	117	32.8	2846218		absent	untypable	tetL, tetT	ermC
UMN6	Human - Long Term Contact	t002		SRR5909264	LLBV00000000	64.26	103	32.8	2811232		absent	untypable	none found	none found
UMN7	Human - Long Term Contact	t002		SRR5909265	LLBW00000000	59.56	137	32.8	2795423		absent	untypable	none found	none found
UMN38	Human - Long Term Contact	t242		SRR5909183	LLBR00000000	28.24	160	32.7	2917114		absent	untypable	none found	ermC
UMN50	Human - Long Term Contact	t2049		SRR5909182	LLBU00000000	24.95	159	32.8	2829751		absent	untypable	tetL, tetT	ermC
UCSF 13502	Human - No Swine Contact	t002		SRR5909185	LLBG00000000	74.95	171	32.9	2836524		present	II	none found	ermA
UCSF 13582	Human - No Swine Contact	t845		SRR5909184	LLBH00000000	58.07	109	32.8	2823785		present	II	none found	ermA
UCSF 13938	Human - No Swine Contact	t002		SRR5909147	LLBI00000000	47.09	296	33	2791917		present	II	none found	ermA
UCSF 14054	Human - No Swine Contact	t14590		SRR5909148	LLBJ00000000	42.02	139	32.9	2670431		present	n/a	none found	none found
UCSF 14262	Human - No Swine Contact	t002		SRR5909181	LLBK00000000	79.08	139	32.8	2850689		present	II	none found	ermA
UCSF 14436	Human - No Swine Contact	t002		SRR5909180	LLBL00000000	55.28	153	32.8	2705834		present	IV	none found	none found
UCSF 14655	Human - No Swine Contact	t002		SRR5909162	LLBM00000000	57.68	100	32.8	2845153		present	II	none found	ermA
UCSF 14811	Human - No Swine Contact	t002		SRR5909161	LLBN00000000	73	103	32.8	2709855		present	II	none found	ermA
UCI 01	Human - No Swine Contact	t045		SRR5909220	LKYS00000000	73.13	118	32.8	2874003		present	II	none found	ermA
UCI 02	Human - No Swine Contact	t045		SRR5909221	LKYT00000000	51.15	162	32.9	2696555		present	II	none found	ermA
UCI 03	Human - No Swine Contact	t002		SRR5909218	LKYU00000000	56	178	32.8	2937262		present	II	none found	none found
UCI 04	Human - No Swine Contact	t242		SRR5909219	LKYV00000000	69.93	137	32.9	2432787		present	II	none found	ermA
UCI 05	Human - No Swine Contact	t242		SRR5909216	LKYW00000000	83.47	105	32.8	2843970		present	II	none found	ermA
UCI 06	Human - No Swine Contact	t002		SRR5909217	LKYX00000000	59.19	111	32.7	2787704		present	IV	none found	none found
UCI 07	Human - No Swine Contact	t002		SRR5909214	LKYY00000000	51.04	158	32.7	2875904		present	II	none found	ermA
UCI 08	Human - No Swine Contact	t045		SRR5909215	LKYZ00000000	53.59	120	32.8	2854165		present	II	none found	ermA
UCI 09	Human - No Swine Contact	t045		SRR5909222	LKZA00000000	82	109	32.8	2655856		present	II	none found	ermA
UCI 10	Human - No Swine Contact	t002		SRR5909223	LKZB00000000	50.26	125	32.8	2866803		present	II	none found	ermA
UCI 11	Human - No Swine Contact	t242		SRR5909280	LKZC00000000	72	176	33	2233728		present	II	none found	ermA
UCI 12	Human - No Swine Contact	t242		SRR5909248	LKZD00000000	61.68	167	32.9	2582612		absent	II	none found	ermA
UCI 13	Human - No Swine Contact	t242		SRR5909251	LKZE00000000	46.01	144	32.9	2759858		present	II	none found	ermA
UCI 14	Human - No Swine Contact	t002		SRR5909250	LKZF00000000	43.15	183	32.8	2878789		present	II	none found	ermA
UCI 15	Human - No Swine Contact	t242		SRR5909245	LKZG00000000	46.2	123	32.9	2840406		absent	II	none found	ermA
UCI 16	Human - No Swine Contact	t242		SRR5909244	LKZH00000000	83.09	117	32.8	2873121		present	II	none found	ermA
UCI 17	Human - No Swine Contact	t242		SRR5909247	LKZI00000000	83.32	140	33	2310753		present	II	none found	ermA
UCI 18	Human - No Swine Contact	t002		SRR5909246	LKZJ00000000	55.44	205	32.8	2901719		present	II	none found	none found
UCI 19	Human - No Swine Contact	t002		SRR5909253	LKZK00000000	47	186	32.8	2958328		present	II	none found	ermA
UCI 20	Human - No Swine Contact	t002		SRR5909252	LKZL00000000	55.04	201	32.8	2895645		present	II	none found	ermA
UCI 21	Human - No Swine Contact	t002		SRR5909230	LKZM00000000	66	160	32.8	2913031		present	II	none found	ermA
UCI 22	Human - No Swine Contact	t002		SRR5909231	LKZN00000000	59.19	148	32.8	2919740		present	II	none found	ermA
UCI 23	Human - No Swine Contact	t002		SRR5909228	LKZO00000000	38.77	311	33	2792437		absent	II	none found	ermA
UCI 24	Human - No Swine Contact	t002		SRR5909229	LKZP00000000	62	175	32.8	2982784		present	II	none found	none found
UCI 25	Human - No Swine Contact	t045		SRR5909226	LKZQ00000000	80.63	125	32.9	2719475		present	II	none found	ermA
UCI 26	Human - No Swine Contact	t242		SRR5909227	LKZR00000000	71.95	114	32.8	2876273		present	II	none found	ermA
UCI 27	Human - No Swine Contact	t242		SRR5909224	LKZS00000000	40	182	32.8	2868741		present	II	none found	ermA
UCI 28	Human - No Swine Contact	t242		SRR5909225	LKZT00000000	48.98	145	32.9	2650712		present	II	none found	ermA
UCI 29	Human - No Swine Contact	t002		SRR5909232	LKZU00000000	65.78	247	32.9	2779574		present	II	none found	none found
UCI 30	Human - No Swine Contact	t002		SRR5909233	LKZV00000000	66.07	148	32.9	2704565		present	II	none found	ermA
UCI 31	Human - No Swine Contact	t242		SRR5909199	LKZW00000000	56.88	219	32.8	2755693		present	II	none found	ermA
UCI 32	Human - No Swine Contact	t242		SRR5909198	LKZX00000000	43.65	269	32.8	2888535		present	II	none found	ermA
UCI 33	Human - No Swine Contact	t002		SRR5909197	LKZY00000000	43.35	242	32.9	2655369		present	II	none found	ermA
UCI 34	Human - No Swine Contact	t242		SRR5909196	LKZZ00000000	49.12	224	32.9	2758127		present	II	none found	ermA
UCI 35	Human - No Swine Contact	t045		SRR5909203	LLAA00000000	46.42	111	32.9	2866646		present	II	none found	ermA
UCI 36	Human - No Swine Contact	t002		SRR5909202	LLAB00000000	46	246	32.8	2864888		present	II	none found	ermA
UCI 37	Human - No Swine Contact	t002		SRR5909201	LLAC00000000	37.53	264	32.8	2864149		present	II	none found	ermA
UCI 38	Human - No Swine Contact	t002		SRR5909200	LLAD00000000	53.12	227	32.8	2864920		present	II	none found	ermA
UCI 39	Human - No Swine Contact	t242		SRR5909195	LLAE00000000	83.79	107	32.9	2755807		present	II	none found	ermA
UCI 40	Human - No Swine Contact	t002		SRR5909194	LLAF00000000	44.79	171	32.9	2801127		present	II	none found	ermA
UCI 41	Human - No Swine Contact	t002		SRR5909173	LLAG00000000	50.09	175	32.7	2882038		absent	II	none found	ermA
UCI 42	Human - No Swine Contact	t002		SRR5909174	LLAH00000000	54.66	160	32.8	2877011		present	II	none found	ermA
UCI 43	Human - No Swine Contact	t242		SRR5909175	LLAI00000000	46	222	33	2712510		present	II	none found	ermA
UCI 44	Human - No Swine Contact	t242		SRR5909176	LLAJ00000000	60.57	140	32.9	2816804		present	II	none found	ermA
UCI 45	Human - No Swine Contact	t242		SRR5909169	LLAK00000000	53	119	32.8	2930151		present	II	none found	ermA
UCI 46	Human - No Swine Contact	t242		SRR5909170	LLAL00000000	73	182	32.9	2862583		present	II	none found	ermA
UCI 47	Human - No Swine Contact	t045		SRR5909171	LLAM00000000	65.17	191	32.9	2709652		absent	II	none found	ermA
UCI 48	Human - No Swine Contact	t242		SRR5909172	LLAN00000000	46	217	32.8	2870306		present	II	none found	ermA
UCI 49	Human - No Swine Contact	t002		SRR5909167	LLAO00000000	57.85	237	33	2708648		present	II	none found	ermA
UCI 50	Human - No Swine Contact	t045		SRR5909168	LLAP00000000	50.05	174	32.9	2622105		present	II	none found	ermA
UCI 51	Human - No Swine Contact	t002		SRR5909187	LLAQ00000000	41.44	184	32.9	2803002		present	II	none found	ermA
UCI 52	Human - No Swine Contact	t002		SRR5909186	LLAR00000000	33	202	32.8	2804605		present	II	none found	ermA
UCI 53	Human - No Swine Contact	t002		SRR5909189	LLAS00000000	69.8	97	32.8	2800052		present	II	none found	ermA
UCI 54	Human - No Swine Contact	t242		SRR5909188	LLAT00000000	49.38	138	33	2200416		present	II	none found	ermA
UCI 55	Human - No Swine Contact	t045		SRR5909191	LLAU00000000	80.91	156	32.9	2475422		absent	II	none found	ermA
UCI 56	Human - No Swine Contact	t242		SRR5909190	LLAV00000000	36	286	32.9	2817741		present	II	none found	ermA
UCI 57	Human - No Swine Contact	t002		SRR5909193	LLAW00000000	80.99	87	32.8	2826064		present	II	none found	ermA
UCI 58	Human - No Swine Contact	t242		SRR5909192	LLAX00000000	79.17	112	32.8	2841271		present	II	none found	ermA
UCI 59	Human - No Swine Contact	t242		SRR5909179	LLAY00000000	82.31	132	32.8	2808503		present	II	none found	ermA
UCI 60	Human - No Swine Contact	t242		SRR5909178	LLAZ00000000	49.91	231	32.9	2714331		present	II	none found	ermA
UCI 61	Human - No Swine Contact	t002		SRR5909165	LLBA00000000	66.52	178	33	2761228		present	II	none found	ermA
UCI 62	Human - No Swine Contact	t242		SRR5909166	LLBB00000000	61.44	131	32.8	2853734		present	II	none found	ermA
UCI 63	Human - No Swine Contact	t045		SRR5909163	LLBC00000000	54.37	96	32.8	2722670		absent	II	none found	ermA
UCI 64	Human - No Swine Contact	t242		SRR5909164	LLBD00000000	52	224	32.8	2702991		present	II	none found	ermA
