# Supplementary material for: Single Nucleotide Polymorphism Analysis Indicates Genetic Distinction and Reduced Diversity of Swine-Associated Methicillin Resistant Staphylococcus aureus (MRSA) ST5 Isolates Compared to Clinical MRSA ST5 Isolates
Source: Front Microbiol. 2018 Sep 11;9:2078. doi: 10.3389/fmicb.2018.02078 (PMC6142820; doi:10.3389/fmicb.2018.02078)
Supplement: TABLE S2 — General features linked to identified SNPs. [file Table_2.xlsx]

## Sheet: summary_genotyper
Table S2. General features linked to identified SNPs
	Total	Number of Genes	Nonsynonymous	Synonymous	Intergenic	Genic
SNPs	764	362	424	186	154	610
Non-informative	517	279	288	134	95	422
Parsimony Informative	247	166	136	52	59	188
Stop Gain	25	22	25	0	0	25
Stop Loss	2	2	2	0	0	2
Hypothetical Proteins	150	87	106	44	0	150
Transition	511	280	265	150	96	415
Transversion	253	166	159	36	58	195
Multiallelic	0	0	0	0	0	0
